# Supplementary material
Source: PubMed Central journal article supplement (PMC4700124)
Supplement: ajnd0004-0028-f6.pdf [file ajnd0004-0028-f6.pdf]

# Immune pathways in ALS

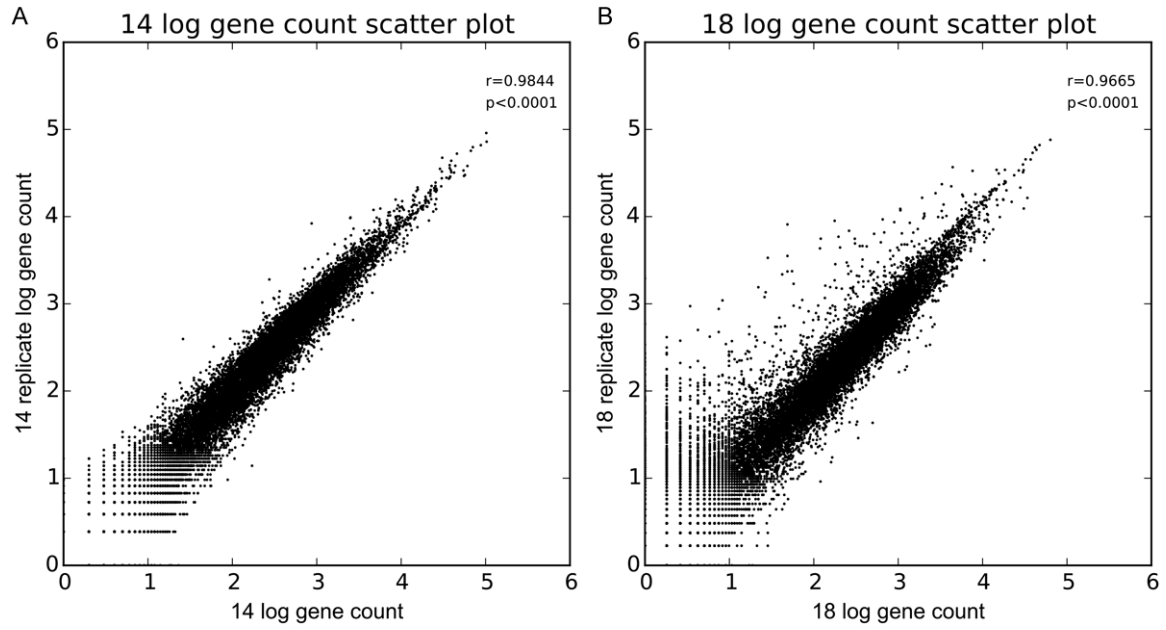

**Supplemental Figure 1.** Clustering of patient population with follow-up samples. Correlation based cluster of PBMC gene counts of UCSC hg19 genes with the patient initial RNA-Seq samples along with follow-up results for (A) patient 14 (14\_R2) and (B) patient 18 (18\_R2).

## Immune pathways in ALS

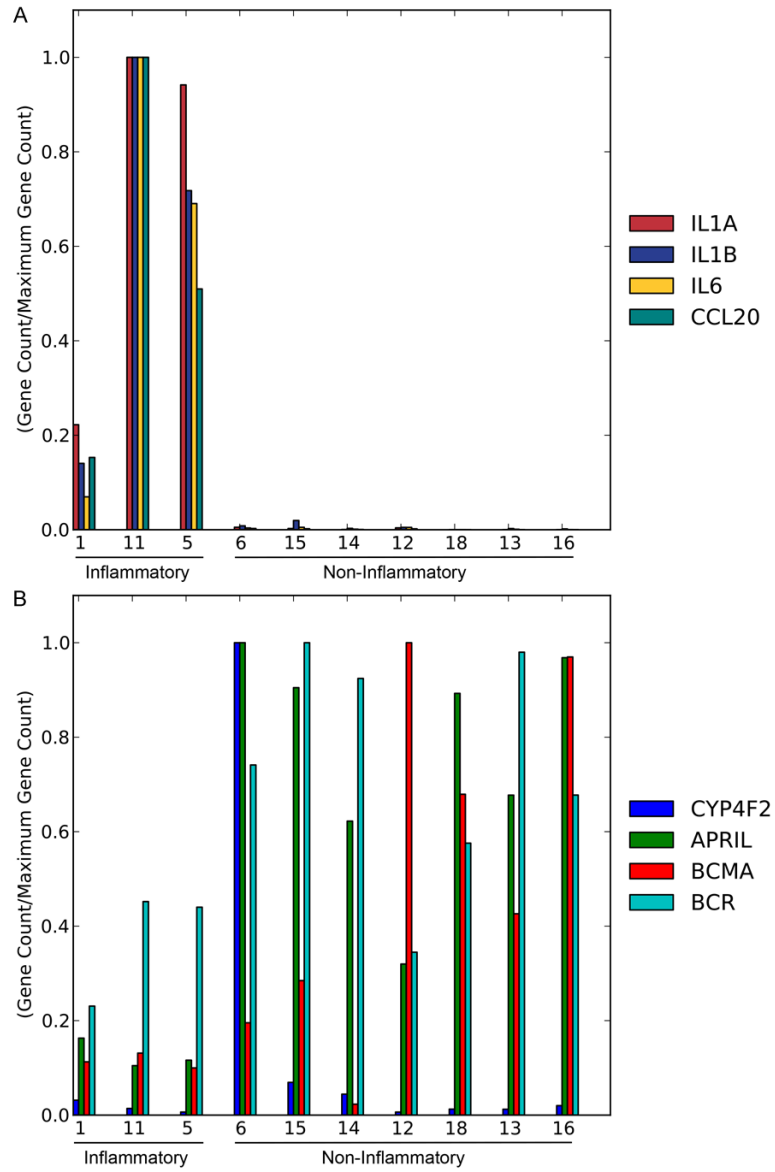

**Supplemental Figure 2.** Transcriptional responses of Th1 and Th2 genes in individual ALS patients. Differential responses by the cytokines, the chemokine CCL20, the enzyme CYP4F2, and the genes in B cells developmental pathway. A. Transcriptional response high in the inflammatory patients (IL1A, IL1B, IL6, CCL2). B. Transcriptional responses high in the non-inflammatory patients (CYP4F2, APRIL, BCMA, BCR).
